# Supplementary material for: Binding for endohedral-metallofullerene superatoms induced by magnetic coupling
Source: Royal Society of Chemistry journal article supplement (doi:10.1039/c8cc08200f), 2018-01-01
Supplement: c8cc08200f1.pdf [file c8cc08200f1.pdf]

## Supporting Information

# Binding for endohedral-metallofullerene superatoms induced by magnetic coupling

*Weiyu Xie*<sup>1,2</sup>, *Wanrun Jiang*<sup>1,2</sup>, *Yang Gao*<sup>1,2</sup>, *Jia Wang*<sup>1,2</sup> and *Zhigang Wang*<sup>\*,1,2</sup>

a. Institute of Atomic and Molecular Physics, Jilin University, Changchun 130012, China

b. Jilin Provincial Key Laboratory of Applied Atomic and Molecular Spectroscopy, Jilin University,  
Changchun 130012, China

\*Corresponding author. E-mail: wangzg@jlu.edu.cn (Z. W.)

## Part 1. Computational result details.

In this work, the relativistic DFT calculations are adopted, which successfully predicted the magnetic coupling phenomenon in the actinide-contained systems in previous reports.<sup>1-3</sup> The magnetic coupling can be described by:

$$J = 2(E_{BS} - E_{HS})/S_{max}^2$$

using Heisenberg-Dirac-van Vleck (HDVV) spin Hamiltonian (SH) and spin-projection technique.<sup>4,5</sup> Here,  $J$  is the exchange coupling constant,  $E_{BS}$  and  $E_{HS}$  are the energies of broken-symmetry state and highest spin state respectively.  $S_{max}$  is the value of the maximum spin. Thus, we could analyse the magnetic coupling from the relative energies of different spin states. In terms of the realistic effect, M06-2X functional<sup>6</sup> were adopted, which is proved to have an advantage in the calculation of intermolecular interaction<sup>7</sup>, small-core relativistic effective core potentials (RECP) covering 60 core electrons with the (14s13p10d8f6g)/[10s9p5d4f3g] valence basis set<sup>8</sup> is used for U, while the valence double-zeta with d-polarization basis set 6-31G\*<sup>9</sup> is for C. Basis sets superposition error (BSSE) is defined as:

$$E_{stable} = E_{corrected} - 2E_{M0}$$

$$E_{corrected} = E_{total} + E_{BSSE}$$

$$E_{BSSE} = E_{M1} - E(M1\_M2_{ghost}) + E_{M2} - E(M1_{ghost}\_M2)$$

$E_{M0}$  and  $E_{total}$  are the total optimized energy of two monomers and complex, respectively.  $E_{M1}$  and  $E_{M2}$  are single-point energies for the monomer 1 and 2 with their geometries abstracted from the (U@C<sub>28</sub>)<sub>2</sub> and using only the monomeric basis sets.  $E(M1\_M2_{ghost})$  and  $E(M1_{ghost}\_M2)$  are single-point energies with the same geometry but under the dimeric basis sets, implemented by adding ghost atoms at nuclear positions of the other monomer. The stability of the wavefunctions of all the electronic states involved in this system are calculated using specialized method<sup>10</sup> in Gaussian 09<sup>11</sup> software. The calculations showed that all these wavefunctions are stable under the perturbations considered. In ADF 2012<sup>12</sup>, the density functional theory with the third generation empirical dispersion correction (DFT-D3<sup>13</sup>) at PBE level are used to reproduce the structure and energy of (U@C<sub>28</sub>)<sub>2</sub>. TZ2P Slater basis sets (relativistic valence triplet-zeta with polarization function) are adopted with a 1s-4d frozen core. For verification, scalar relativistic and spin-orbit calculations

using zero-order regular approximations at PBE-D3 level have been performed to optimize the two adsorptions and it was found that the relative energies between the two optimized adsorption structures are almost the same among these functionals as shown in Table S5.

**Table S1.** Total and relative energies of  $U@C_{28}$  at M06-2x/RECP levels in Gaussian 09.

|            | El. State    | Total Energy (Hartree) | Relative Energy (eV) |
|------------|--------------|------------------------|----------------------|
| $U@C_{28}$ | Closed-shell | -1542.95976            | 0.05                 |
|            | Triplet      | -1542.96144            | 0.0                  |
|            | Quintet      | -1542.23700            | 19.7                 |

**Table S2.** Total and relative energies (including ZPE corrections) of  $(U@C_{28})_2$  at M06-2x/RECP levels in Gaussian 09.

|                     | El. State | Total Energy (Hartree) | Relative Energies (eV) |
|---------------------|-----------|------------------------|------------------------|
| Chemical adsorption | BS        | -3085.68227            | 0                      |
|                     | Triplet   | -3085.68226            | 0.0003                 |
| Physical adsorption | BS        | -3085.59532            | 2.3660                 |
|                     | Quintet   | -3085.59464            | 2.3845                 |

**Table S3.** Bond and relative energies of  $(U@C_{28})_2$  using Scalar-ZORA-PBE-D3 functional in ADF 2012.

|                     | El. State | Bond Energy (Hartree) | Relative Energies (eV) |
|---------------------|-----------|-----------------------|------------------------|
| Chemical adsorption | BS        | -18.26702             | 0                      |
|                     | Triplet   | -18.26693             | 0.0002                 |
| Physical adsorption | BS        | -18.19155             | 2.0536                 |
|                     | Quintet   | -18.18956             | 2.1126                 |

**Table S4.** Bond and relative energies of (U@C<sub>28</sub>)<sub>2</sub> using SOC-ZORA-PBE-D3 functional.

|                     | Bond Energy (Hartree) | Relative Energies (eV) |
|---------------------|-----------------------|------------------------|
| Chemical adsorption | -18.94594             | 0                      |
| Physical adsorption | -18.87121             | 2.0334                 |

**Table S5.** The relative energies of (U@C<sub>28</sub>)<sub>2</sub> using different functionals.

|                    |                     | Relative Energies (eV) |
|--------------------|---------------------|------------------------|
| M06-2X/RECP        | Chemical adsorption | 0                      |
|                    | Physical adsorption | 2.3660                 |
| Scalar-ZORA-PBE-D3 | Chemical adsorption | 0                      |
|                    | Physical adsorption | 2.0536                 |
| SOC-ZORA-PBE-D3    | Chemical adsorption | 0                      |
|                    | Physical adsorption | 2.0334                 |

**Table S6.** Coordinates of the optimized structures.

| Structure | Number | Atom | x (Å)     | y (Å)    | z (Å)     |
|-----------|--------|------|-----------|----------|-----------|
| BSc       | 1      | U    | -0.000475 | 3.537512 | 0.009525  |
|           | 2      | C    | -0.745900 | 5.552117 | -1.180528 |
|           | 3      | C    | 2.454124  | 3.497534 | 0.218350  |
|           | 4      | C    | -1.025905 | 3.407889 | 2.246243  |
|           | 5      | C    | -0.728364 | 1.471181 | -1.329490 |
|           | 6      | C    | 1.160755  | 2.691107 | 1.965208  |
|           | 7      | C    | -1.802150 | 3.520696 | -1.609185 |
|           | 8      | C    | -0.521306 | 3.553467 | -2.355839 |
|           | 9      | C    | 1.150992  | 4.181516 | 2.014355  |
|           | 10     | C    | -0.816964 | 1.431950 | 1.015849  |
|           | 11     | C    | 1.451727  | 4.821776 | -1.423125 |
|           | 12     | C    | 1.336263  | 5.521036 | -0.125060 |
|           | 13     | C    | -1.972761 | 2.186668 | 0.515418  |
|           | 14     | C    | 1.356945  | 1.488201 | -0.250352 |
|           | 15     | C    | -0.852124 | 5.464724 | 1.150069  |
|           | 16     | C    | -2.010709 | 4.732933 | 0.594609  |
|           | 17     | C    | 1.461449  | 2.274708 | -1.485709 |
|           | 18     | C    | 2.107178  | 3.534502 | -1.184937 |
|           | 19     | C    | -2.076747 | 3.427078 | 1.253298  |

|    |   |           |           |           |
|----|---|-----------|-----------|-----------|
| 20 | C | -0.018828 | 0.764171  | -0.144422 |
| 21 | C | -0.050229 | 5.958210  | 0.031399  |
| 22 | C | 1.944527  | 2.273402  | 0.813087  |
| 23 | C | 0.139032  | 2.278291  | -2.141726 |
| 24 | C | -0.226739 | 4.623010  | 2.184226  |
| 25 | C | -1.928703 | 4.772811  | -0.866815 |
| 26 | C | -0.210831 | 2.217779  | 2.068995  |
| 27 | C | 1.959977  | 4.679374  | 0.909936  |
| 28 | C | -1.892448 | 2.226242  | -0.957912 |
| 29 | C | 0.139004  | 4.825871  | -2.072020 |
| 30 | U | 0.000475  | -3.537512 | 0.009525  |
| 31 | C | 0.745900  | -5.552117 | -1.180528 |
| 32 | C | 1.025905  | -3.407889 | 2.246243  |
| 33 | C | 0.728364  | -1.471181 | -1.329490 |
| 34 | C | -2.454124 | -3.497534 | 0.218350  |
| 35 | C | 0.816964  | -1.431950 | 1.015849  |
| 36 | C | -1.451727 | -4.821776 | -1.423125 |
| 37 | C | -1.336263 | -5.521036 | -0.125060 |
| 38 | C | 1.972761  | -2.186668 | 0.515418  |
| 39 | C | -1.356945 | -1.488201 | -0.250352 |
| 40 | C | 0.852124  | -5.464724 | 1.150069  |
| 41 | C | 2.010709  | -4.732933 | 0.594609  |
| 42 | C | -1.461449 | -2.274708 | -1.485709 |
| 43 | C | -1.160755 | -2.691107 | 1.965208  |
| 44 | C | 1.802150  | -3.520696 | -1.609185 |
| 45 | C | 0.521306  | -3.553467 | -2.355839 |
| 46 | C | -1.150992 | -4.181516 | 2.014355  |
| 47 | C | -1.944527 | -2.273402 | 0.813087  |
| 48 | C | -0.139032 | -2.278291 | -2.141726 |
| 49 | C | 0.226739  | -4.623010 | 2.184226  |
| 50 | C | 1.928703  | -4.772811 | -0.866815 |
| 51 | C | 0.210831  | -2.217779 | 2.068995  |
| 52 | C | -1.959977 | -4.679374 | 0.909936  |
| 53 | C | 1.892448  | -2.226242 | -0.957912 |
| 54 | C | -0.139004 | -4.825871 | -2.072020 |
| 55 | C | 0.050229  | -5.958210 | 0.031399  |
| 56 | C | 2.076747  | -3.427078 | 1.253298  |
| 57 | C | -2.107178 | -3.534502 | -1.184937 |
| 58 | C | 0.018828  | -0.764171 | -0.144422 |

| Structure | Number | Atom | x (Å)     | y (Å)     | z (Å)     |
|-----------|--------|------|-----------|-----------|-----------|
| Triplet   | 1      | U    | -0.000512 | 3.537571  | 0.009527  |
|           | 2      | C    | -0.745038 | 5.552335  | -1.180818 |
|           | 3      | C    | 2.453934  | 3.497505  | 0.220094  |
|           | 4      | C    | -1.027530 | 3.407715  | 2.245513  |
|           | 5      | C    | -0.727534 | 1.471367  | -1.330229 |
|           | 6      | C    | 1.159308  | 2.690918  | 1.965933  |
|           | 7      | C    | -1.801040 | 3.520991  | -1.610451 |
|           | 8      | C    | -0.519667 | 3.553811  | -2.356186 |
|           | 9      | C    | 1.149549  | 4.181317  | 2.015246  |
|           | 10     | C    | -0.817769 | 1.431908  | 1.015034  |
|           | 11     | C    | 1.452733  | 4.821961  | -1.421933 |
|           | 12     | C    | 1.336384  | 5.521091  | -0.123879 |
|           | 13     | C    | -1.973186 | 2.186723  | 0.513866  |
|           | 14     | C    | 1.357051  | 1.488213  | -0.249598 |
|           | 15     | C    | -0.852915 | 5.464673  | 1.149692  |
|           | 16     | C    | -2.011125 | 4.732977  | 0.593328  |
|           | 17     | C    | 1.462433  | 2.274888  | -1.484803 |
|           | 18     | C    | 2.107983  | 3.534637  | -1.183432 |
|           | 19     | C    | -2.077663 | 3.427049  | 1.251822  |
|           | 20     | C    | -0.018824 | 0.764196  | -0.144726 |
|           | 21     | C    | -0.050213 | 5.958262  | 0.031649  |
|           | 22     | C    | 1.943874  | 2.273335  | 0.814325  |
|           | 23     | C    | 0.140478  | 2.278600  | -2.141725 |
|           | 24     | C    | -0.228289 | 4.622827  | 2.184205  |
|           | 25     | C    | -1.928098 | 4.773026  | -0.868034 |
|           | 26     | C    | -0.212363 | 2.217604  | 2.068699  |
|           | 27     | C    | 1.959345  | 4.679283  | 0.911473  |
|           | 28     | C    | -1.891831 | 2.226482  | -0.959395 |
|           | 29     | C    | 0.140478  | 4.826168  | -2.071750 |
|           | 30     | U    | 0.000512  | -3.537571 | 0.009527  |
|           | 31     | C    | 0.745038  | -5.552335 | -1.180818 |
|           | 32     | C    | 1.027530  | -3.407715 | 2.245513  |
|           | 33     | C    | 0.727534  | -1.471367 | -1.330229 |
|           | 34     | C    | -2.453934 | -3.497505 | 0.220094  |
|           | 35     | C    | 0.817769  | -1.431908 | 1.015034  |
|           | 36     | C    | -1.452733 | -4.821961 | -1.421933 |
|           | 37     | C    | -1.336384 | -5.521091 | -0.123879 |

|    |   |           |           |           |
|----|---|-----------|-----------|-----------|
| 38 | C | 1.973186  | -2.186723 | 0.513866  |
| 39 | C | -1.357051 | -1.488213 | -0.249598 |
| 40 | C | 0.852915  | -5.464673 | 1.149692  |
| 41 | C | 2.011125  | -4.732977 | 0.593328  |
| 42 | C | -1.462433 | -2.274888 | -1.484803 |
| 43 | C | -1.159308 | -2.690918 | 1.965933  |
| 44 | C | 1.801040  | -3.520991 | -1.610451 |
| 45 | C | 0.519667  | -3.553811 | -2.356186 |
| 46 | C | -1.149549 | -4.181317 | 2.015246  |
| 47 | C | -1.943874 | -2.273335 | 0.814325  |
| 48 | C | -0.140478 | -2.278600 | -2.141725 |
| 49 | C | 0.228289  | -4.622827 | 2.184205  |
| 50 | C | 1.928098  | -4.773026 | -0.868034 |
| 51 | C | 0.212363  | -2.217604 | 2.068699  |
| 52 | C | -1.959345 | -4.679283 | 0.911473  |
| 53 | C | 1.891831  | -2.226482 | -0.959395 |
| 54 | C | -0.140478 | -4.826168 | -2.071750 |
| 55 | C | 0.050213  | -5.958262 | 0.031649  |
| 56 | C | 2.077663  | -3.427049 | 1.251822  |
| 57 | C | -2.107983 | -3.534637 | -1.183432 |
| 58 | C | 0.018824  | -0.764196 | -0.144726 |

| Structure | Number | Atom | x (Å)     | y (Å)     | z (Å)     |
|-----------|--------|------|-----------|-----------|-----------|
| BSp       | 1      | U    | -3.626108 | 0.010846  | -0.081289 |
|           | 2      | C    | -2.722241 | 1.141145  | -2.093035 |
|           | 3      | C    | -2.862408 | 1.211486  | 1.947940  |
|           | 4      | C    | -6.097834 | 0.016413  | -0.167035 |
|           | 5      | C    | -2.802366 | -2.325282 | -0.011942 |
|           | 6      | C    | -5.022637 | 0.352398  | 1.867225  |
|           | 7      | C    | -2.824837 | -1.180107 | -2.034354 |
|           | 8      | C    | -1.646231 | -0.744156 | -1.262874 |
|           | 9      | C    | -4.993577 | 1.617143  | 1.108045  |
|           | 10     | C    | -4.985121 | -1.857982 | 0.642509  |
|           | 11     | C    | -1.683582 | 1.464405  | -0.039092 |
|           | 12     | C    | -2.884336 | 2.318680  | -0.095523 |
|           | 13     | C    | -4.933934 | -1.883827 | -0.831791 |
|           | 14     | C    | -2.963438 | -1.110522 | 1.963124  |
|           | 15     | C    | -4.905825 | 1.573156  | -1.417368 |
|           | 16     | C    | -4.883881 | 0.282778  | -2.132483 |

|    |   |           |           |           |
|----|---|-----------|-----------|-----------|
| 17 | C | -1.733475 | -0.700315 | 1.260351  |
| 18 | C | -3.640040 | -2.126204 | 1.155184  |
| 19 | C | -5.626672 | -0.697887 | -1.338779 |
| 20 | C | -1.671766 | 0.762983  | 1.246546  |
| 21 | C | -3.542256 | 2.105665  | -1.385454 |
| 22 | C | -3.677737 | 0.094923  | 2.385843  |
| 23 | C | -1.633974 | -1.462370 | 0.013555  |
| 24 | C | -5.662530 | 1.400496  | -0.176052 |
| 25 | C | -3.506607 | 0.009062  | -2.547275 |
| 26 | C | -5.710029 | -0.656104 | 1.058703  |
| 27 | C | -3.630330 | 2.149752  | 1.152136  |
| 28 | C | -3.556819 | -2.167975 | -1.240325 |
| 29 | C | -1.583587 | 0.718798  | -1.295902 |
| 30 | U | 3.626081  | -0.011398 | 0.081194  |
| 31 | C | 2.732914  | 1.232942  | 2.029236  |
| 32 | C | 2.878102  | 1.089185  | -2.009525 |
| 33 | C | 6.097501  | -0.029047 | 0.170610  |
| 34 | C | 2.776266  | -2.338883 | 0.133491  |
| 35 | C | 5.028421  | 0.211354  | -1.880247 |
| 36 | C | 2.809597  | -1.089144 | 2.092880  |
| 37 | C | 1.636724  | -0.681404 | 1.297720  |
| 38 | C | 5.012717  | 1.514547  | -1.188588 |
| 39 | C | 4.964841  | -1.931126 | -0.541053 |
| 40 | C | 1.699969  | 1.459323  | -0.040494 |
| 41 | C | 2.910387  | 2.301858  | -0.026986 |
| 42 | C | 4.911865  | -1.878661 | 0.932493  |
| 43 | C | 2.953093  | -1.231417 | -1.902502 |
| 44 | C | 4.921985  | 1.604490  | 1.335641  |
| 45 | C | 4.884693  | 0.353761  | 2.117307  |
| 46 | C | 1.727026  | -0.771116 | -1.224407 |
| 47 | C | 3.617349  | -2.210857 | -1.041091 |
| 48 | C | 5.617321  | -0.675467 | 1.377518  |
| 49 | C | 1.681757  | 0.691487  | -1.287476 |
| 50 | C | 3.564445  | 2.149750  | 1.273438  |
| 51 | C | 3.681302  | -0.057920 | -2.386806 |
| 52 | C | 1.617767  | -1.465504 | 0.060687  |
| 53 | C | 5.677683  | 1.358276  | 0.106163  |
| 54 | C | 3.504027  | 0.117684  | 2.543852  |
| 55 | C | 5.703452  | -0.760780 | -1.018626 |



|    |   |          |           |           |
|----|---|----------|-----------|-----------|
| 56 | C | 3.655624 | 2.059406  | -1.262989 |
| 57 | C | 3.531209 | -2.125545 | 1.353224  |
| 58 | C | 1.590480 | 0.781820  | 1.253597  |

| Structure | Number | Atom | x (Å)     | y (Å)     | z (Å)     |
|-----------|--------|------|-----------|-----------|-----------|
| Quintet   | 1      | U    | 0.000000  | 0.000000  | 3.673995  |
|           | 2      | C    | -2.022141 | -1.167484 | 2.847420  |
|           | 3      | C    | 0.000000  | 2.334967  | 2.847420  |
|           | 4      | C    | 0.000000  | 0.000000  | 6.149711  |
|           | 5      | C    | 2.022141  | -1.167484 | 2.847420  |
|           | 6      | C    | 0.737595  | 1.884883  | 5.005936  |
|           | 7      | C    | 0.000000  | -2.310955 | 2.942493  |
|           | 8      | C    | 0.000000  | -1.459421 | 1.737624  |
|           | 9      | C    | -0.737595 | 1.884883  | 5.005936  |
|           | 10     | C    | 2.001154  | -0.303665 | 5.005936  |
|           | 11     | C    | -1.263895 | 0.729710  | 1.737624  |
|           | 12     | C    | -2.001346 | 1.155478  | 2.942493  |
|           | 13     | C    | 1.263559  | -1.581217 | 5.005936  |
|           | 14     | C    | 2.001346  | 1.155478  | 2.942493  |
|           | 15     | C    | -2.001154 | -0.303665 | 5.005936  |
|           | 16     | C    | -1.263559 | -1.581217 | 5.005936  |
|           | 17     | C    | 1.263895  | 0.729710  | 1.737624  |
|           | 18     | C    | 2.470585  | -0.040787 | 3.644166  |
|           | 19     | C    | 0.000000  | -1.385363 | 5.718909  |
|           | 20     | C    | 0.000000  | 1.467181  | 1.684997  |
|           | 21     | C    | -2.470585 | -0.040787 | 3.644166  |
|           | 22     | C    | 1.199970  | 2.159982  | 3.644166  |
|           | 23     | C    | 1.270616  | -0.733591 | 1.684997  |
|           | 24     | C    | -1.199759 | 0.692681  | 5.718909  |
|           | 25     | C    | -1.270615 | -2.119195 | 3.644166  |
|           | 26     | C    | 1.199759  | 0.692681  | 5.718909  |
|           | 27     | C    | -1.199970 | 2.159982  | 3.644166  |
|           | 28     | C    | 1.270615  | -2.119195 | 3.644166  |
|           | 29     | C    | -1.270616 | -0.733591 | 1.684997  |
|           | 30     | U    | 0.000000  | 0.000000  | -3.673995 |
|           | 31     | C    | 0.000000  | 2.334967  | -2.847420 |
|           | 32     | C    | -2.022141 | -1.167484 | -2.847420 |
|           | 33     | C    | 0.000000  | 0.000000  | -6.149711 |
|           | 34     | C    | 2.022141  | -1.167484 | -2.847420 |

|    |   |           |           |           |
|----|---|-----------|-----------|-----------|
| 35 | C | -1.263559 | -1.581217 | -5.005936 |
| 36 | C | 2.001346  | 1.155478  | -2.942493 |
| 37 | C | 1.263895  | 0.729710  | -1.737624 |
| 38 | C | -2.001154 | -0.303665 | -5.005936 |
| 39 | C | 1.263559  | -1.581217 | -5.005936 |
| 40 | C | -1.263895 | 0.729710  | -1.737624 |
| 41 | C | -2.001346 | 1.155478  | -2.942493 |
| 42 | C | 2.001154  | -0.303665 | -5.005936 |
| 43 | C | 0.000000  | -2.310955 | -2.942493 |
| 44 | C | -0.737595 | 1.884883  | -5.005936 |
| 45 | C | 0.737595  | 1.884883  | -5.005936 |
| 46 | C | 0.000000  | -1.459421 | -1.737624 |
| 47 | C | 1.270615  | -2.119195 | -3.644166 |
| 48 | C | 1.199759  | 0.692681  | -5.718909 |
| 49 | C | -1.270616 | -0.733591 | -1.684997 |
| 50 | C | -1.199970 | 2.159982  | -3.644166 |
| 51 | C | -1.270615 | -2.119195 | -3.644166 |
| 52 | C | 1.270616  | -0.733591 | -1.684997 |
| 53 | C | -1.199759 | 0.692681  | -5.718909 |
| 54 | C | 1.199970  | 2.159982  | -3.644166 |
| 55 | C | 0.000000  | -1.385363 | -5.718909 |
| 56 | C | -2.470585 | -0.040787 | -3.644166 |
| 57 | C | 2.470585  | -0.040787 | -3.644166 |
| 58 | C | 0.000000  | 1.467181  | -1.684997 |

---

## Part 2. Potential energy surface scanning.

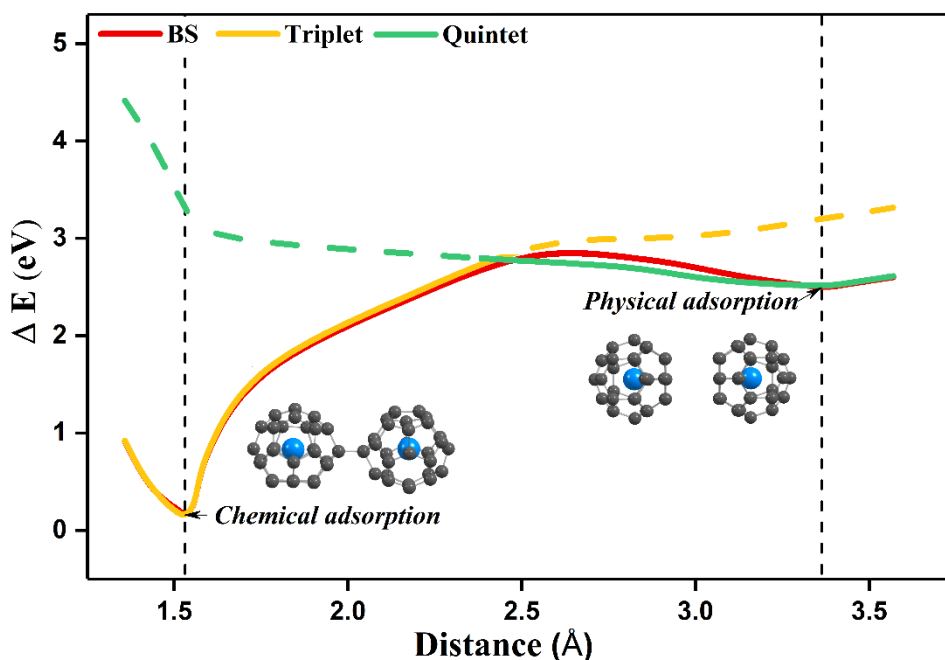

**Figure S1.** The potential energy surface scanning of the involved electronic states in this system. The distance is according to the length of nearest C atoms between superatoms. Two dash lines are equilibrium positions of chemical adsorption (left) and physical adsorption (right), respectively. It should be noticed that the PES scanning is reliable with regard to the triplet solid curve and the quintet solid curve. However, the reliability of the triplet and quintet dash curves is not supported by the HDVV SH. The presence of these dash curves are just for the completeness of the results and a qualitative demonstration of corresponding PESs with smooth profiles.

Actually, the two adsorption structures have different spin states respectively, because of the electron rearrangement of two superatoms during the combining. To prove it, we scan the potential energy surface for different electronic states. The potential energy curves of triplet state are monotone decreasing and the quintet state is monotone increasing. On the contrary, the BS state has a global-minimum point and a local-minimum point on the potential energy curve. And the BS state is the ground state both in chemical and physical adsorptions. These results show that there is only one stable adsorption structure in triplet and quintet states, but two stable adsorption structures in BS state.

### Part 3. Structures, spin properties of both adsorptions.

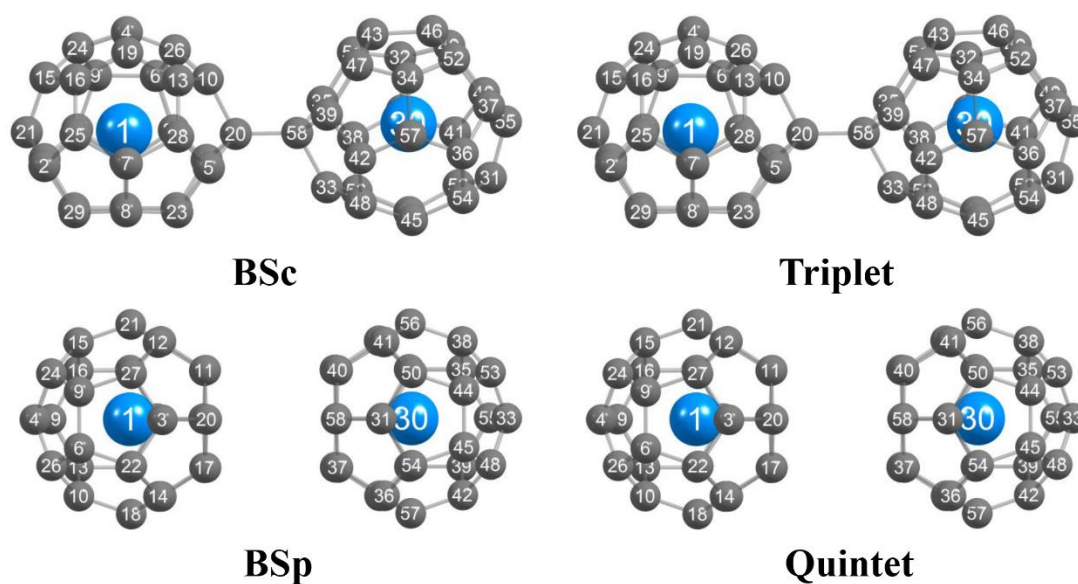

**Figure S2.** Structures with atom labels of involved states in both adsorptions.

**Table S7.** Spin population of involved states in both adsorptions.

|     | Chemical adsorption |           | Physical adsorption |           |
|-----|---------------------|-----------|---------------------|-----------|
|     | BSc                 | Triplet   | BSp                 | Quintet   |
| 1U  | -0.188577           | -0.188005 | -0.381058           | -0.374765 |
| 2C  | -0.020693           | -0.020635 | -0.037012           | -0.038102 |
| 3C  | -0.012649           | -0.012686 | -0.035779           | -0.036627 |
| 4C  | -0.012681           | -0.012698 | -0.035909           | -0.036917 |
| 5C  | -0.027595           | -0.027464 | -0.038791           | -0.035736 |
| 6C  | -0.013622           | -0.013664 | 0.025541            | 0.025840  |
| 7C  | -0.019134           | -0.019187 | 0.024627            | 0.024449  |
| 8C  | -0.019203           | -0.019169 | 0.021856            | 0.028213  |
| 9C  | -0.023851           | -0.023860 | 0.025316            | 0.025572  |
| 10C | 0.021280            | 0.020975  | 0.025611            | 0.025558  |
| 11C | 0.023280            | 0.023252  | 0.028144            | 0.021782  |
| 12C | 0.024669            | 0.024775  | 0.022658            | 0.027870  |
| 13C | 0.055866            | 0.055875  | 0.024997            | 0.025720  |
| 14C | 0.020768            | 0.020942  | 0.026103            | 0.024739  |
| 15C | 0.024874            | 0.024884  | 0.025033            | 0.025920  |
| 16C | 0.023214            | 0.023190  | 0.026109            | 0.025123  |
| 17C | 0.056205            | 0.056227  | 0.021378            | 0.025829  |
| 18C | -0.002203           | -0.002220 | 0.181738            | 0.181120  |

---

|            |              |              |              |              |
|------------|--------------|--------------|--------------|--------------|
| 19C        | -0.002179    | -0.002188    | 0.180390     | 0.182965     |
| 20C        | -0.002359    | -0.003227    | 0.183376     | 0.190499     |
| 21C        | 0.003623     | 0.003581     | 0.181422     | 0.181099     |
| 22C        | 0.096262     | 0.096516     | 0.177322     | 0.183200     |
| 23C        | 0.160781     | 0.160863     | 0.200748     | 0.181069     |
| 24C        | 0.142782     | 0.142840     | 0.179463     | 0.184159     |
| 25C        | 0.144682     | 0.144756     | 0.177356     | 0.184358     |
| 26C        | 0.096863     | 0.096926     | 0.181283     | 0.183649     |
| 27C        | 0.142933     | 0.143031     | 0.182248     | 0.181287     |
| 28C        | 0.160929     | 0.161181     | 0.184642     | 0.180731     |
| 29C        | 0.145212     | 0.145188     | 0.188667     | 0.201337     |
| <b>SUM</b> | <b>≈1.00</b> | <b>≈1.00</b> | <b>≈2.00</b> | <b>≈2.00</b> |
| 30U        | 0.188577     | -0.188005    | 0.381373     | -0.374894    |
| 31C        | 0.020693     | -0.020635    | 0.036839     | -0.036839    |
| 32C        | 0.012681     | -0.012698    | 0.035844     | -0.035754    |
| 33C        | 0.027595     | -0.027464    | 0.035850     | -0.036845    |
| 34C        | 0.012649     | -0.012686    | 0.039075     | -0.038009    |
| 35C        | -0.021280    | 0.020975     | -0.025400    | 0.025810     |
| 36C        | -0.023280    | 0.023252     | -0.023970    | 0.027961     |
| 37C        | -0.024669    | 0.024775     | -0.022570    | 0.022098     |
| 38C        | -0.055866    | 0.055875     | -0.025435    | 0.025484     |
| 39C        | -0.020768    | 0.020942     | -0.025381    | 0.025006     |
| 40C        | -0.024874    | 0.024884     | -0.026640    | 0.025218     |
| 41C        | -0.023214    | 0.023190     | -0.023502    | 0.025053     |
| 42C        | -0.056205    | 0.056227     | -0.025300    | 0.026144     |
| 43C        | 0.013622     | -0.013664    | -0.025802    | 0.024204     |
| 44C        | 0.019134     | -0.019187    | -0.025476    | 0.025917     |
| 45C        | 0.019203     | -0.019169    | -0.025860    | 0.025538     |
| 46C        | 0.023851     | -0.023860    | -0.021929    | 0.028367     |
| 47C        | -0.096262    | 0.096516     | -0.181866    | 0.184768     |
| 48C        | -0.160781    | 0.160863     | -0.179883    | 0.184092     |
| 49C        | -0.142782    | 0.142840     | -0.184384    | 0.181344     |
| 50C        | -0.144682    | 0.144756     | -0.180766    | 0.183544     |
| 51C        | -0.096863    | 0.096926     | -0.177831    | 0.180964     |
| 52C        | -0.142933    | 0.143031     | -0.200177    | 0.198640     |
| 53C        | -0.160929    | 0.161181     | -0.179772    | 0.183542     |
| 54C        | -0.145212    | 0.145188     | -0.178590    | 0.182025     |
| 55C        | -0.003623    | 0.003581     | -0.181579    | 0.182869     |
| 56C        | 0.002179     | -0.002188    | -0.182187    | 0.181170     |

---

---

|                  |               |              |               |              |
|------------------|---------------|--------------|---------------|--------------|
| 57C              | 0.002203      | -0.002220    | -0.184169     | 0.180880     |
| 58C              | 0.002359      | -0.003227    | -0.187990     | 0.191763     |
| <b>Sum</b>       | <b>≈-1.00</b> | <b>≈1.00</b> | <b>≈-2.00</b> | <b>≈2.00</b> |
| <b>Total Sum</b> | <b>≈ 0.00</b> | <b>≈2.00</b> | <b>≈ 0.00</b> | <b>≈4.00</b> |

---

## Part 4. Frontier MOs diagrams for involved states.

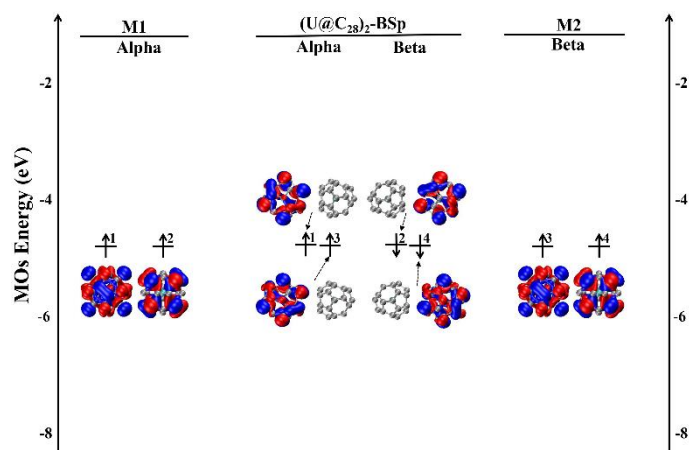

**Figure S3.** The  $(U@C_{28})_2$ -BSp frontier MOs diagram between two  $U@C_{28}$  superatoms. M1 and M2 are the two  $U@C_{28}$  monomers. The same number represents the composition of  $U@C_{28}$  monomers' orbitals in  $(U@C_{28})_2$ -BSp orbitals. Isosurface=0.02

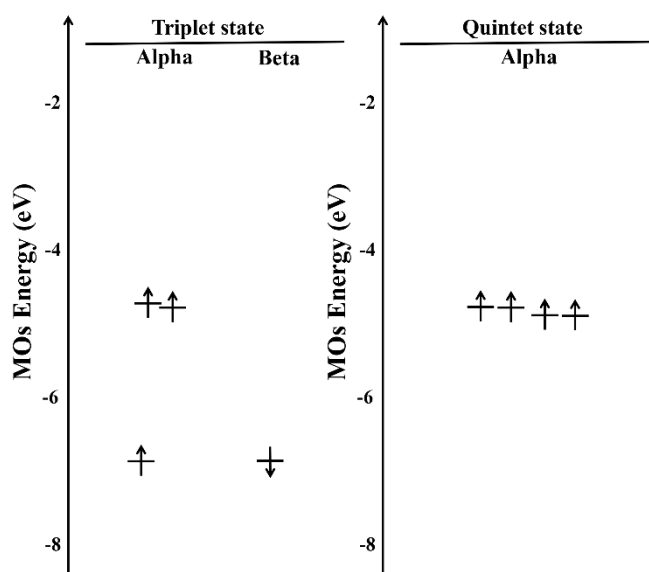

**Figure S4.** The high-spin state frontier MOs diagrams in both adsorptions between two  $U@C_{28}$  superatoms.

## Part 5. Orbital compositions of (U@C<sub>28</sub>)<sub>2</sub>-BSc by different methods.

We analyzed the orbital components of U valence shells by different methods. As shown in Table S7 and S8, the U-5f contribution area has 28 MOs which is from HOMO-1 to HOMO-14 in alpha and beta spin state. The compositions of these MOs are from 26.75% to 17.64% in Mulliken method, which is proved by Hirshfeld method (22.51% to 15.13%). The U-6d, 7p contributions area is from HOMO-27 to HOMO-42, the composition of these MOs are from 13.19% to 5.05% (in Mulliken method) and from 11.10% to 5.35% (in Hirshfeld method). The U-7s contributions area is HOMO-65 and HOMO-66, the composition of these MOs are 6.14% and 6.93% (in Mulliken method), 6.31% and 7.06% (in Hirshfeld method). Overall, the composition data obtained by different methods have the same direction. These data indicate that all the valence shells of U should be fully closed upon hybridization with the cage, similar to the U@C<sub>28</sub> report <sup>14</sup>.

**Table S8.** The orbital compositions of (U@C<sub>28</sub>)<sub>2</sub>-BSc by Mulliken method.

| (U@C <sub>28</sub> ) <sub>2</sub> -BSc | U composition |         |       |       | Occ |    |
|----------------------------------------|---------------|---------|-------|-------|-----|----|
|                                        | Alpha, beta   | 5f      | 6d    | 7p    |     | 7s |
| HOMO                                   |               | 0.5%    |       |       |     | 2  |
| HOMO-1                                 |               | 19.97 % |       |       |     | 2  |
| HOMO-2                                 |               | 26.75 % |       |       |     | 2  |
| HOMO-3                                 |               | 19.41 % |       |       |     | 2  |
| HOMO-4                                 |               | 18.81 % |       |       |     | 2  |
| HOMO-5                                 |               | 22.44 % |       |       |     | 2  |
| HOMO-6                                 |               | 22.31 % |       |       |     | 2  |
| HOMO-7                                 |               | 21.49 % |       |       |     | 2  |
| HOMO-8                                 |               | 20.69%  |       |       |     | 2  |
| HOMO-9                                 |               | 20.43%  |       |       |     | 2  |
| HOMO-10                                |               | 20.43%  |       |       |     | 2  |
| HOMO-11                                |               | 18.95%  |       |       |     | 2  |
| HOMO-12                                |               | 18.98%  |       |       |     | 2  |
| HOMO-13                                |               | 18.17%  |       |       |     | 2  |
| HOMO-14                                |               | 17.64%  |       |       |     | 2  |
| Total                                  |               |         |       |       |     | 28 |
| HOMO-27                                |               |         | 5.89% | 5.51% |     | 2  |
| HOMO-28                                |               |         | 4.40% | 4.94% |     | 2  |



|           |       |       |    |
|-----------|-------|-------|----|
| HOMO-29   | 5.27% | 7.92% | 2  |
| HOMO-30   | 5.48% | 7.16% | 2  |
| HOMO-31   | 4.24% | 7.71% | 2  |
| HOMO-32   | 2.84% | 8.23% | 2  |
| HOMO-33   | 4.43% | 7.47% | 2  |
| HOMO-34   | 3.49% | 7.16% | 2  |
| HOMO-35   | 3.53% | 7.22% | 2  |
| HOMO-36   | 3.58% | 6.68% | 2  |
| HOMO-37   | 9.32% | 0.61% | 2  |
| HOMO-38   | 8.32% | 1.99% | 2  |
| HOMO-39   | 6.19% | 1.50% | 2  |
| HOMO-40   | 7.17% | 0.87% | 2  |
| HOMO-41   | 9.70% | 0.34% | 2  |
| HOMO-42   | 4.78% | 0.27% | 2  |
| Total     |       |       | 32 |
| HOMO-65   |       | 6.14% | 2  |
| HOMO-66   |       | 6.93% | 2  |
| Total     |       |       | 4  |
| Total all |       |       | 64 |

**Table S9.** The orbital compositions of (U@C<sub>28</sub>)<sub>2</sub>-BSc by Hirshfeld method

| (U@C <sub>28</sub> ) <sub>2</sub> -BSc | U      | Occ |
|----------------------------------------|--------|-----|
| Alpha, beta                            |        |     |
| HOMO                                   | 2.00%  | 2   |
| HOMO-1                                 | 18.38% | 2   |
| HOMO-2                                 | 22.51% | 2   |
| HOMO-3                                 | 17.77% | 2   |
| HOMO-4                                 | 16.76% | 2   |
| HOMO-5                                 | 19.58% | 2   |
| HOMO-6                                 | 19.19% | 2   |
| HOMO-7                                 | 18.59% | 2   |
| HOMO-8                                 | 18.24% | 2   |
| HOMO-9                                 | 19.14% | 2   |
| HOMO-10                                | 17.39% | 2   |
| HOMO-11                                | 17.96% | 2   |
| HOMO-12                                | 17.64% | 2   |

---

|         |        |   |
|---------|--------|---|
| HOMO-13 | 15.84% | 2 |
| HOMO-14 | 15.13% | 2 |
| HOMO-27 | 9.92%  | 2 |
| HOMO-28 | 8.32%  | 2 |
| HOMO-29 | 11.10% | 2 |
| HOMO-30 | 10.87% | 2 |
| HOMO-31 | 10.04% | 2 |
| HOMO-32 | 9.39%  | 2 |
| HOMO-33 | 10.20% | 2 |
| HOMO-34 | 9.03%  | 2 |
| HOMO-35 | 9.29%  | 2 |
| HOMO-36 | 8.90%  | 2 |
| HOMO-37 | 9.11%  | 2 |
| HOMO-38 | 9.09%  | 2 |
| HOMO-39 | 7.12%  | 2 |
| HOMO-40 | 7.61%  | 2 |
| HOMO-41 | 9.24%  | 2 |
| HOMO-42 | 5.35%  | 2 |
| HOMO-65 | 6.31%  | 2 |
| HOMO-66 | 7.06%  | 2 |

---

## Part 6. Schemes for all the involved vibration mode.

**Table S10.** The twelve vibration mode diagrams from 0 to 400  $\text{cm}^{-1}$  in  $(\text{U}@\text{C}_{28})_2\text{-BSc}$ .

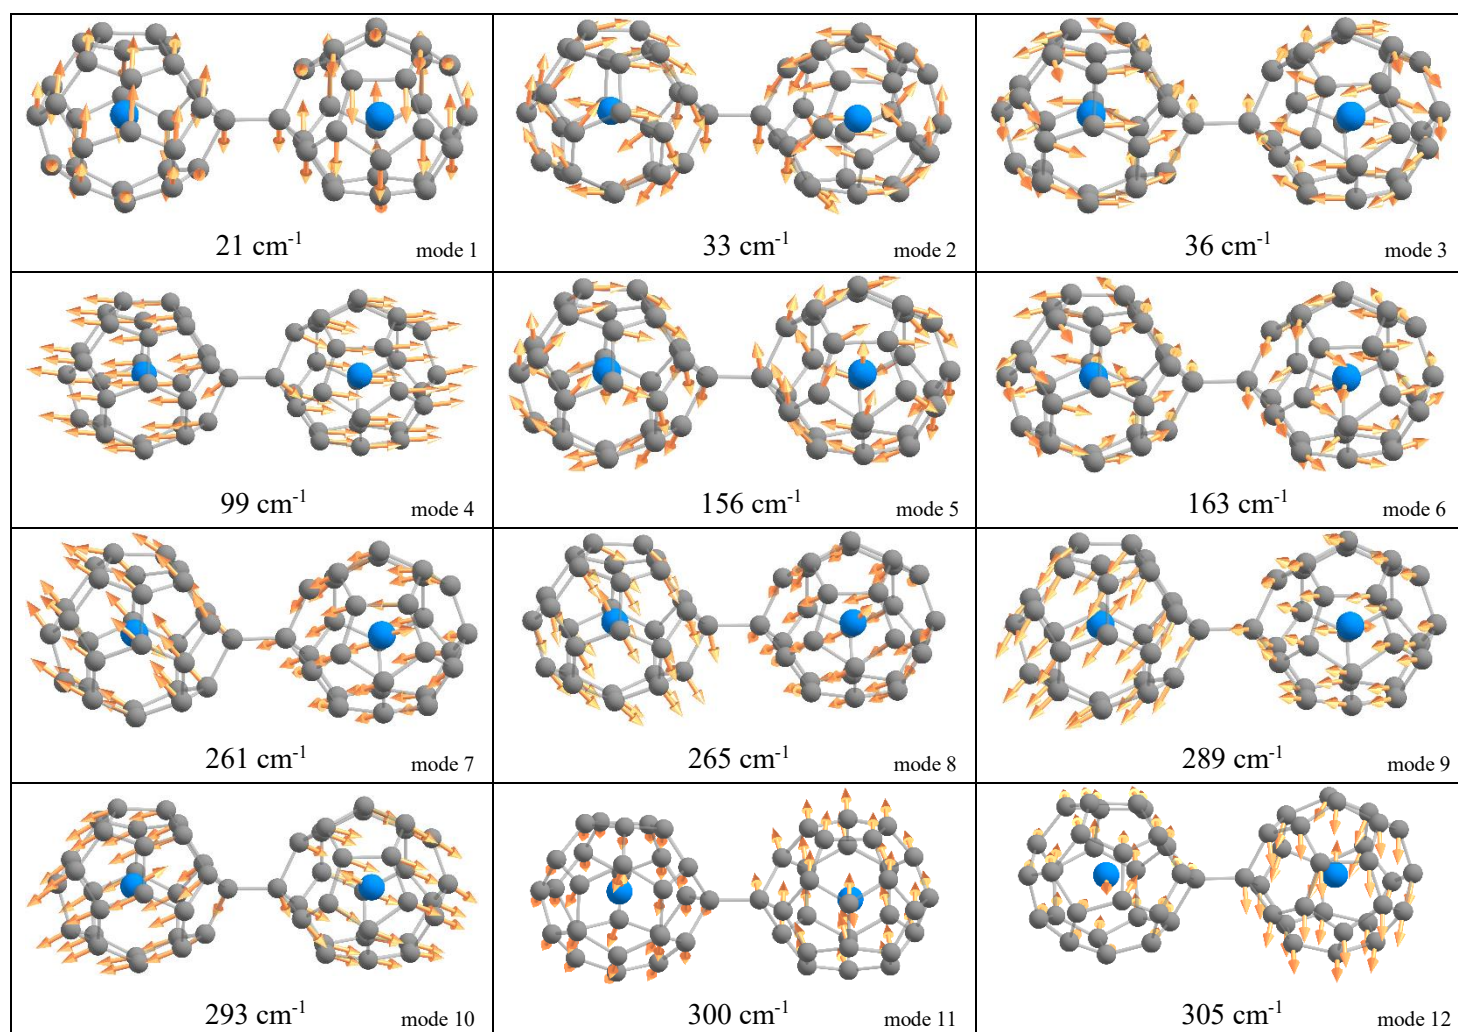

## References

1. Kozimor S. A., Bartlett B. M., Rinehart J. D., Long J. R., *J. Am. Chem. Soc.* **2007**, 129, 10672-10674.
2. Gryaznov D., Heifets E., Sedmidubsky D. *Phys. Chem. Chem. Phys.* **2010**, 12, 12273-12278.
3. Lichtenberger N., Wilson R. J., Eulenstein A. R., Massa W., Clérac R., Weigend F., Dehnen S., *J. Am. Chem. Soc.* **2016**, 138, 9033-9036.
4. van Vleck J. H., *The Theory of Electric and Magnetic Susceptibilities*, Oxford University Press, Oxford, 1932.
5. Yin B., Lin J., Bai H., Wen Z., Jiang Z. and Huang Y., *Phys. Chem. Chem. Phys.*, 2012, 14, 1121-1130.
6. Zhao Y. and Truhlar D. G., *Theor. Chem. Acc.*, **2008**, 120, 215-241.
7. Hohenstein E. G., Chill S. T. and Sherrill C. D., *J. Chem. Theory Comput.*, **2008**, 4, 1996-2000.
8. Cao X., Dolg M., *J. Mol. Struct.: THEOCHEM*, **2004**, 673, 203-209.
9. Hariharan P. C., Pople J. A., *Theor. Chim. Act.*, **1973**, 28, 213-222.
10. Bauernschmitt R., Ahlrichs R. *J. Chem. Phys.* **1996**, 104, 9047-9052.
11. Frisch M. J., Trucks G. W., Schlegel H. B., Scuseria G. E., Robb M. A., Cheeseman J. R., Scalmani G., Barone V., Mennucci B., Petersson G. A., Nakatsuji H., Caricato M., Li X., Hratchian H. P., Izmaylov A. F., Bloino J., Zheng G., Sonnenberg J. L., Hada M., Ehara M., Toyota K., Fukuda R., Hasegawa J., Ishida M., Nakajima T., Honda Y., Kitao O., Nakai H., Vreven T., Montgomery J. A., Peralta Jr., J. E., Ogliaro F.,

Bearpark M., Heyd J. J., Brothers E., Kudin K. N., Staroverov V. N., Kobayashi R., Normand J., Raghavachari K., Rendell A., Burant J. C., Iyengar S. S., Tomasi J., Cossi M., Rega N., Millam J. M., Klene M., Knox J. E., Cross J. B., Bakken V., Adamo C., Jaramillo J., Gomperts R., Stratmann R. E., Yazyev O., Austin A. J., Cammi R., Pomelli C., Ochterski J. W., Martin R. L., Morokuma K., Zakrzewski V. G., Voth G. A., Salvador P., Dannenberg J. J., Dapprich S., Daniels A. D., Farkas O., Foresman J. B., Ortiz J. V., Cioslowski J. and Fox D. J., Gaussian 09, Revision D.01, Gaussian, Inc., Wallingford CT, 2009.

12. Velde G., Bickelhaupt F. M., Baerends E. J., Fonseca Guerra C., van Gisbergen S. J. A., Snijders J. G. and Ziegler T., *J. Comput. Chem*, **2001**, *22*, 931-967.

13. Grimme S., Antony J., Ehrlich S., Krieg H., *J. Chem. Phys.* **2010**, *132*, 154104.

14. Dai X., Gao Y., Jiang W., Lei Y., Wang Z., *Phys. Chem. Chem. Phys.* **2015**, *17*, 23308-23311.
